# Supplementary material for: Phenotypic Characterization of Female Carrier Mice Heterozygous for Tafazzin Deletion
Source: MDPI journal article supplement (doi:10.3390/biology12091238), 2023-09-14
Supplement: s1 [file s1]

**Supplementary Table S1.** Relative mass percentage of fatty acid species and major fatty acid classes within cardiolipin in the hearts of 12-month-old *Taz*-HET mice and *Wt* female littermates.

| Fatty acid             | <i>Wt</i> females ( <i>n</i> = 9) | <i>Taz</i> -HET females ( <i>n</i> = 12) | P value       |
|------------------------|-----------------------------------|------------------------------------------|---------------|
| 14:0                   | 0.35 ± 0.02                       | 0.38 ± 0.03                              | 0.5550        |
| 16:0                   | 8.91 ± 0.46                       | 9.55 ± 0.45                              | 0.3390        |
| 18:0                   | 5.23 ± 0.12                       | 5.69 ± 0.21                              | 0.1021        |
| SFAs                   | 14.49 ± 0.50                      | 15.61 ± 0.54                             | 0.1577        |
| 16:1n-7                | 1.59 ± 0.11                       | 1.42 ± 0.12                              | 0.3226        |
| <b>18:1n-7</b>         | <b>5.16 ± 0.14</b>                | <b>6.22 ± 0.22</b>                       | <b>0.0014</b> |
| 18:1n-9                | 10.74 ± 0.49                      | 10.26 ± 0.70                             | 0.6027        |
| 22:1n-9                | 4.13 ± 0.64                       | 6.36 ± 1.02                              | 0.1052        |
| <b>MUFAs</b>           | <b>21.64 ± 0.63</b>               | <b>24.26 ± 0.94</b>                      | <b>0.0443</b> |
| <b>18:2n-6</b>         | <b>49.92 ± 0.90</b>               | <b>46.08 ± 1.15</b>                      | <b>0.0221</b> |
| 20:2n-6                | 1.01 ± 0.04                       | 1.14 ± 0.04                              | 0.0613        |
| <b>20:3n-6</b>         | <b>1.22 ± 0.03</b>                | <b>1.08 ± 0.04</b>                       | <b>0.0173</b> |
| 20:4n-6                | 1.57 ± 0.03                       | 1.57 ± 0.06                              | 0.9918        |
| <b>n-6 PUFAs</b>       | <b>53.72 ± 0.88</b>               | <b>49.87 ± 1.16</b>                      | <b>0.0216</b> |
| 18:3n-3                | 1.00 ± 0.08                       | 0.85 ± 0.04                              | 0.0802        |
| 22:6n-3                | 6.80 ± 0.30                       | 6.63 ± 0.30                              | 0.7034        |
| n-3 PUFAs              | 7.80 ± 0.29                       | 7.48 ± 0.28                              | 0.4442        |
| Total FA (µg/mg heart) | 1.09 ± 0.05                       | 1.01 ± 0.05                              | 0.2984        |

Values are percentages of total fatty acids (FA) within cardiolipin, and expressed as mean ± S.E.M. Values reaching the statistical threshold of  $P < 0.05$  are bolded. SFA: saturated fatty acids; MUFA: monounsaturated fatty acids; PUFA: polyunsaturated fatty acids.
